# Supplementary material for: Pharmacokinetic and Pharmacodynamic Characteristics of Dasiglucagon, a Novel Soluble and Stable Glucagon Analog
Source: Oxford University Press journal article supplement (doi:10.2337/dc17-1402), 2017-12-22
Supplement: dc171402supplementarydata.pdf [file dc171402supplementarydata.pdf]

SUPPLEMENTARY DATA

**Supplementary Table S1.** Demographic and baseline characteristics (safety analysis set)

| Parameter                                   | Group 1       | Group 2       | Group 3       | Group 4       | Total         |
|---------------------------------------------|---------------|---------------|---------------|---------------|---------------|
|                                             | <b>N = 8</b>  | <b>N = 17</b> | <b>N = 17</b> | <b>N = 16</b> | <b>N = 58</b> |
| <b>Sex</b> <sub>(m)</sub>                   | <b>62.5 %</b> | <b>41.2%</b>  | <b>52.9%</b>  | <b>62.5%</b>  | <b>53.4%</b>  |
| <b>Sex</b> <sub>(f)</sub>                   | 37.5%         | 58.8%         | 47.1%         | 37.5%         | 46.6%         |
| <b>Age</b> <sub>[years]</sub>               | 41.6 (8.31)   | 35.4 (8.66)   | 34.0 (9.17)   | 37.5 (8.15)   | 36.4 (8.76)   |
| <b>Weight</b> <sub>[kg]</sub>               | 76.56 (5.494) | 76.81 (6.368) | 78.67 (7.897) | 73.94 (8.777) | 76.53 (7.493) |
| <b>BMI</b> <sub>[kg/m<sup>2</sup>]</sub>    | 24.39 (0.960) | 24.65 (1.945) | 26.21 (2.776) | 24.74 (2.962) | 25.09 (2.486) |
| <b>HbA1c</b> <sub>[%]</sub>                 | 7.41 (0.210)  | 6.88 (0.494)  | 7.24 (0.585)  | 7.19 (0.571)  | 7.14 (0.539)  |
| <b>HbA1c</b> <sub>[mmol/mol]</sub>          | 57.5          | 51.7          | 55.6          | 55.1          | 54.5          |
| <b>Diabetes duration</b> <sub>[years]</sub> | 19.9 (11.49)  | 18.4 (10.28)  | 19.2 (10.43)  | 18.6 (5.29)   | 18.9 (9.17)   |

For sex, relative (%) numbers of male (m) and female (f) patients are shown. For all other parameters, arithmetic means with standard deviations (SD) are shown. All Patients were white. BMI, body mass index; HbA<sub>1c</sub>, glycosylated hemoglobin; N, number of subjects.

SUPPLEMENTARY DATA

**Supplementary Table S2. Dose Proportionality**

| <b>Parameter</b>              | <b>Treatment/<br/>Comparison</b> | <b>Slope</b> | <b>95% Confidence Interval</b> |
|-------------------------------|----------------------------------|--------------|--------------------------------|
| <b>AUC<sub>0-30min</sub></b>  | Overall                          | 0.885        | (0.7403; 1.0292)               |
| <b>AUC<sub>0-360min</sub></b> | Overall                          | 1.029        | (0.9667; 1.0904)               |
| <b>AUC<sub>0-inf</sub></b>    | Overall                          | 1.030        | (0.9683; 1.0916)               |
| <b>C<sub>max</sub></b>        | Overall                          | 0.888        | (0.7791; 0.9972)               |

SUPPLEMENTARY DATA

**Supplementary Table S3. Treatment-Emergent Adverse Events (TEAEs)**

|                                                           | Dasiglucagon   |        |                |                | GlucaGen        |                 |
|-----------------------------------------------------------|----------------|--------|----------------|----------------|-----------------|-----------------|
| Dose                                                      | 0.1 mg         | 0.3 mg | 0.6 mg         | 1.0 mg         | 0.5 mg          | 1.0 mg          |
| N                                                         | 6              | 16     | 17             | 16             | 17              | 34              |
| Number of total TEAE                                      | 6              | 26     | 27             | 23             | 21              | 40              |
| <b>Most frequent-Treatment-Emergent Adverse Events</b>    |                |        |                |                |                 |                 |
| Nausea                                                    | 1              | 9      | 9              | 7              | 9               | 18              |
| Vomiting                                                  | 0              | 6      | 6              | 2              | 4               | 4               |
| Headache*                                                 | 3              | 8      | 6              | 5              | 1               | 7               |
| Injection Site Reactions                                  | 1              | 2      | 1              | 3              | 1               | 4               |
| Others                                                    | 1              | 3      | 6              | 6              | 6               | 7               |
| <b>Treatment-Emergent Hypoglycemic Events (post-dose)</b> |                |        |                |                |                 |                 |
|                                                           | Dasiglucagon   |        |                |                | GlucaGen        |                 |
| Dose                                                      | 0.1 mg         | 0.3 mg | 0.6 mg         | 1.0 mg         | 0.5 mg          | 1.0 mg          |
| N                                                         | 6              | 16     | 17             | 16             | 17              | 34              |
| Post-dose dasiglucagon injection                          | 2 <sup>#</sup> | 0      | 1 <sup>†</sup> | 2 <sup>†</sup> |                 |                 |
| Post-dose GlucaGen <sup>®</sup> injection                 |                |        |                |                | 3 <sup>**</sup> | 6 <sup>**</sup> |

No severe adverse events occurred. \*22 headache events occurred in 19 patients after dosing with dasiglucagon. 3 of these events were considered to be not or unlikely related to study drug due to start time beyond observation period (6 h). <sup>#</sup>Two hypoglycemic events occurred in the one patient 0.1 and 1.5 h post-dose. The early event after 0.1 h was due to a protracted decline of blood glucose after dosing, as consequence of the insulin-induced hypoglycemic procedure. <sup>†</sup>Three other patients experienced hypoglycemia more than 100 h after dosing with dasiglucagon. <sup>\*\*</sup>After GlucaGen, 2 hypoglycemic events occurred immediately post-dose (0.08 and 0.1 h) and seven events occurred after about 4-6 h. The early event after 0.08 h was due to a protracted decline of blood glucose after dosing, as consequence of the insulin-induced hypoglycemic procedure.

SUPPLEMENTARY DATA

**Supplementary Figure S1. Chemical structure of dasiglucagon**  
**Abbreviated Chemical Name:**

**H-His-Ser-Gln-Gly-Thr-Phe-Thr-Ser-Asp-Tyr-Ser-Lys-Tyr-Leu-Asp-Aib-Ala-Arg-Ala-Glu-Glu-Phe-Val-Lys-Trp-Leu-Glu-Ser-Thr-OH, hydrochloride salt**

**Supplementary Figure S2. Trial Design**

|                                                       |                                                                                     |                                                             |
|-------------------------------------------------------|-------------------------------------------------------------------------------------|-------------------------------------------------------------|
| <b>Group 1</b><br>8 patients<br>with type 1 diabetes  |    | 0.1 mg s.c. dasiglucagon (n=6)<br>1 mg GlucaGen® s.c. (n=2) |
| <b>Group 2</b><br>16 patients<br>with type 1 diabetes |  | 0.3 mg dasiglucagon s.c.<br>0.5 mg GlucaGen® s.c.           |
| <b>Group 3</b><br>16 patients<br>with type 1 diabetes |  | 0.6 mg dasiglucagon s.c.<br>1 mg GlucaGen® s.c.             |
| <b>Group 4</b><br>16 patients<br>with type 1 diabetes |  | 1 mg dasiglucagon s.c.<br>1 mg GlucaGen® s.c.               |
